# Supplementary material
Source: PubMed Central journal article supplement (PMC3172619)

## Supporting Information

### Figure S1. Comparison between the extracted ion chromatogram at m/z 204.086 and the total ion chromatogram of the HCD-alone LC-MS/MS experiment on the enriched HEK293T sample.

The extracted ion chromatogram at m/z 204.086 (bottom panel) delineates the retention time profile of O-GlcNAc modified peptides eluted over the entire gradient. In comparison with the total ion chromatogram, the normalized peak height of the extracted ion chromatogram indicates the substoichiometric nature of O-GlcNAc modification and therefore suggests the importance of selective fragmentation on O-GlcNAc peptides.

### Figure S2. Comparison between the total ion chromatogram and the respective extracted ion chromatogram at m/z 204.086, m/z 186.076, m/z 168.065, m/z 144.065, m/z 138.054, and m/z 126.054 of the HCD/ETD LC-MS/MS experiment on the enriched HEK293T sample.

In comparison to the total ion chromatogram, the respective extracted ion chromatograms at the m/z values of 6 signature ions of HexNAc illustrates the retention time profiles of O-GlcNAc modified peptides and further indicates the substoichiometry of O-GlcNAc modification. The difference in the normalized peak heights of each extracted ion chromatogram suggests the prevalence of respective signature ions.

### Figure S3. Multiple-engine database search strategy for analysis on the enriched HEK293T sample.

Raw spectra were searched twice using three search engines: SEQUEST, Mascot and ProteinProspector. The first search was performed against the entire human database without allowing for HexNAc modification, and the output was filtered at 5% peptide-level FDR and exported as the limited protein database; the second search was performed against the exported database allowing for HexNAc modification, and the output from each search engine was filtered at 1% peptide-level FDR, manually verified and combined with each other to produce the final list of O-GlcNAc modified peptides.

### Figure S4. HCD and ETD spectra of O-Mannose and O-GalNAc modified peptides.

(A) HCD spectrum of peptide Ac-IRt(Man)t(Man)t(GalNAc)SGVPR-NH<sub>2</sub> at low m/z range; (B) HCD spectrum of peptide Ac-PTTt(GalNAc)PLK-NH<sub>2</sub> at low m/z range; (C) HCD spectrum of peptide Ac-RIRTTt(Man)SGVPR-NH<sub>2</sub> at low m/z range; (D) ETD spectrum of peptide Ac-IRt(Man)t(Man)t(GalNAc)SGVPR-NH<sub>2</sub>; (E) ETD spectrum of peptide Ac-PTTt(GalNAc)PLK-NH<sub>2</sub>; (F) ETD spectrum of peptide Ac-RIRTTt(Man)SGVPR-NH<sub>2</sub>.

### Table S1. Fragments of HexNAc and Hexose oxonium ions.

### Table S2. List of proteins identified in the enriched HEK293T sample by HCD/ETD approach.

186 proteins were identified at 1% pepFDR from the multi-antibody enriched HEK293T cell extract. In comparison with the recently published work from our group<sup>11</sup> that used the same sample, 67% (124/186) of the identified proteins were consistent with the result from previous experiment. Of the

33% (62/186) of the dataset that was only observed in our current study, 17 proteins were supported in the literature<sup>6, 12-17</sup> as being O-GlcNAc modified and 45 were identified as novel O-GlcNAc proteins.

**Table S3. List of validated O-GlcNAc modified peptides identified in the enriched HEK293T sample by HCD/ETD approach.**

83 O-GlcNAc sites on 172 glycopeptides from 13 proteins were validated. By comparing to literature<sup>1-10</sup>, 13 of the 83 sites have been previously identified and 70 O-GlcNAc sites were newly discovered in our study; and 11 of the 13 characterized proteins were also observed but not site-mapped in the previously work from our group<sup>11</sup>.

**Table S4. List of validated O-GlcNAc modified peptides identified in the enriched HEK293T sample by HCD-alone approach.**

7 O-GlcNAc sites were identified on 9 glycopeptides from 3 proteins after manual validation. 5 of the glycopeptides, corresponding to 2 O-GlcNAc sites, were also observed in the HCD/ETD analysis. Most validated peptides in the table present with low Xcorr scores due the low ratio of ion match.

**Table S5. List of validated O-GlcNAc modified peptides identified in the enriched HEK293T sample by HCD/ETD approach using multiple-engine database searches.**

165 O-GlcNAc sites on 178 glycopeptides from 40 proteins were identified using multiple search engines. By comparing to literature<sup>1-10</sup>, 29 of the 165 sites have been previously assigned leaving 136 novel O-GlcNAc sites; and 22 of the 40 characterized proteins were also observed in the previously work from our group<sup>11</sup>, whereas 18 of the 40 proteins are novel.

## Supporting References

1. Wang, Z.; Udeshi, N. D.; Slawson, C.; Compton, P. D.; Sakabe, K.; Cheung, W. D.; Shabanowitz, J.; Hunt, D. F.; Hart, G. W., Extensive crosstalk between O-GlcNAcylation and phosphorylation regulates cytokinesis. *Sci Signal* **2010**, 3, (104), ra2.
2. Chalkley, R. J.; Thalhammer, A.; Schoepfer, R.; Burlingame, A. L., Identification of protein O-GlcNAcylation sites using electron transfer dissociation mass spectrometry on native peptides. *Proc Natl Acad Sci U S A* **2009**, 106, (22), 8894-9.
3. Zachara, N. E.; Molina, H.; Wong, K. Y.; Pandey, A.; Hart, G. W., The dynamic stress-induced "O-GlcNAc-ome" highlights functions for O-GlcNAc in regulating DNA damage/repair and other cellular pathways. *Amino Acids* **2011**, 40, (3), 793-808.
4. Zeidan, Q.; Wang, Z.; De Maio, A.; Hart, G. W., O-GlcNAc cycling enzymes associate with the translational machinery and modify core ribosomal proteins. *Mol Biol Cell* **2010**, 21, (12), 1922-36.
5. Zachara, N. E.; Cheung, W. D.; Hart, G. W., Nucleocytoplasmic glycosylation, O-GlcNAc: identification and site mapping. *Methods Mol Biol* **2004**, 284, 175-94.
6. Vosseller, K.; Trinidad, J. C.; Chalkley, R. J.; Specht, C. G.; Thalhammer, A.; Lynn, A. J.; Snedecor, J. O.; Guan, S.; Medzihradzky, K. F.; Maltby, D. A.; Schoepfer, R.; Burlingame, A. L., O-linked N-acetylglucosamine proteomics of postsynaptic density preparations using lectin weak affinity chromatography and mass spectrometry. *Mol Cell Proteomics* **2006**, 5, (5), 923-34.

7. Wells, L.; Vosseller, K.; Cole, R. N.; Cronshaw, J. M.; Matunis, M. J.; Hart, G. W., Mapping sites of O-GlcNAc modification using affinity tags for serine and threonine post-translational modifications. *Mol Cell Proteomics* **2002**, 1, (10), 791-804.
8. Wang, Z.; Gucek, M.; Hart, G. W., Cross-talk between GlcNAcylation and phosphorylation: site-specific phosphorylation dynamics in response to globally elevated O-GlcNAc. *Proc Natl Acad Sci U S A* **2008**, 105, (37), 13793-8.
9. Wang, Z.; Park, K.; Comer, F.; Hsieh-Wilson, L. C.; Saudek, C. D.; Hart, G. W., Site-specific GlcNAcylation of human erythrocyte proteins: potential biomarker(s) for diabetes. *Diabetes* **2009**, 58, (2), 309-17.
10. Hu, P.; Shimoji, S.; Hart, G. W., Site-specific interplay between O-GlcNAcylation and phosphorylation in cellular regulation. *FEBS Lett* **2010**, 584, (12), 2526-38.
11. Teo, C. F.; Ingale, S.; Wolfert, M. A.; Elsayed, G. A.; Not, L. G.; Chatham, J. C.; Wells, L.; Boons, G. J., Glycopeptide-specific monoclonal antibodies suggest new roles for O-GlcNAc. *Nat Chem Biol* **2010**, 6, (5), 338-43.
12. Zachara, N. E.; Hart, G. W., O-GlcNAc a sensor of cellular state: the role of nucleocytoplasmic glycosylation in modulating cellular function in response to nutrition and stress. *Biochim Biophys Acta* **2004**, 1673, (1-2), 13-28.
13. Zachara, N. E.; Hart, G. W., O-GlcNAc modification: a nutritional sensor that modulates proteasome function. *Trends Cell Biol* **2004**, 14, (5), 218-21.
14. Dias, W. B.; Hart, G. W., O-GlcNAc modification in diabetes and Alzheimer's disease. *Mol Biosyst* **2007**, 3, (11), 766-72.
15. Hart, G. W.; Housley, M. P.; Slawson, C., Cycling of O-linked beta-N-acetylglucosamine on nucleocytoplasmic proteins. *Nature* **2007**, 446, (7139), 1017-22.
16. Copeland, R. J.; Bullen, J. W.; Hart, G. W., Cross-talk between GlcNAcylation and phosphorylation: roles in insulin resistance and glucose toxicity. *Am J Physiol Endocrinol Metab* **2008**, 295, (1), E17-28.
17. Laczy, B.; Hill, B. G.; Wang, K.; Paterson, A. J.; White, C. R.; Xing, D.; Chen, Y. F.; Darley-Usmar, V.; Oparil, S.; Chatham, J. C., Protein O-GlcNAcylation: a new signaling paradigm for the cardiovascular system. *Am J Physiol Heart Circ Physiol* **2009**, 296, (1), H13-28.

Fig. S1

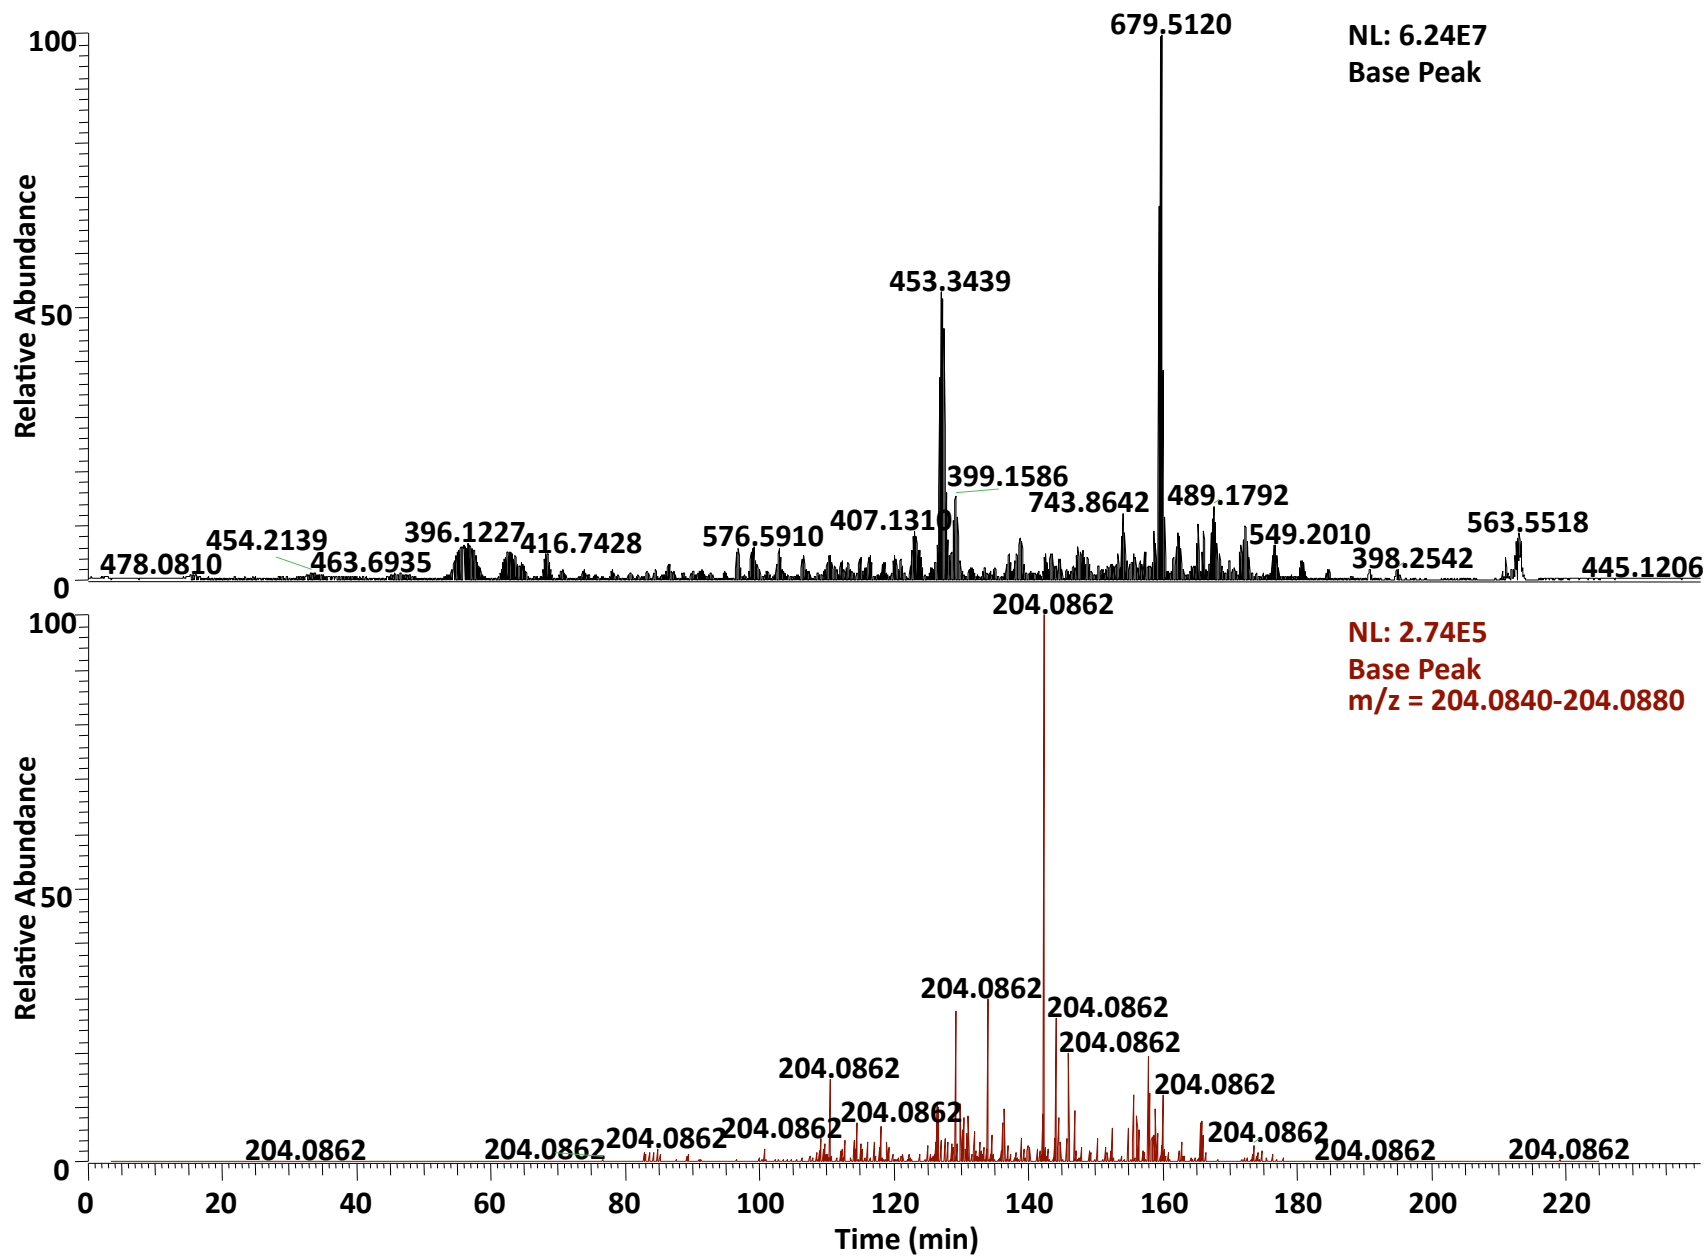

Fig. S2

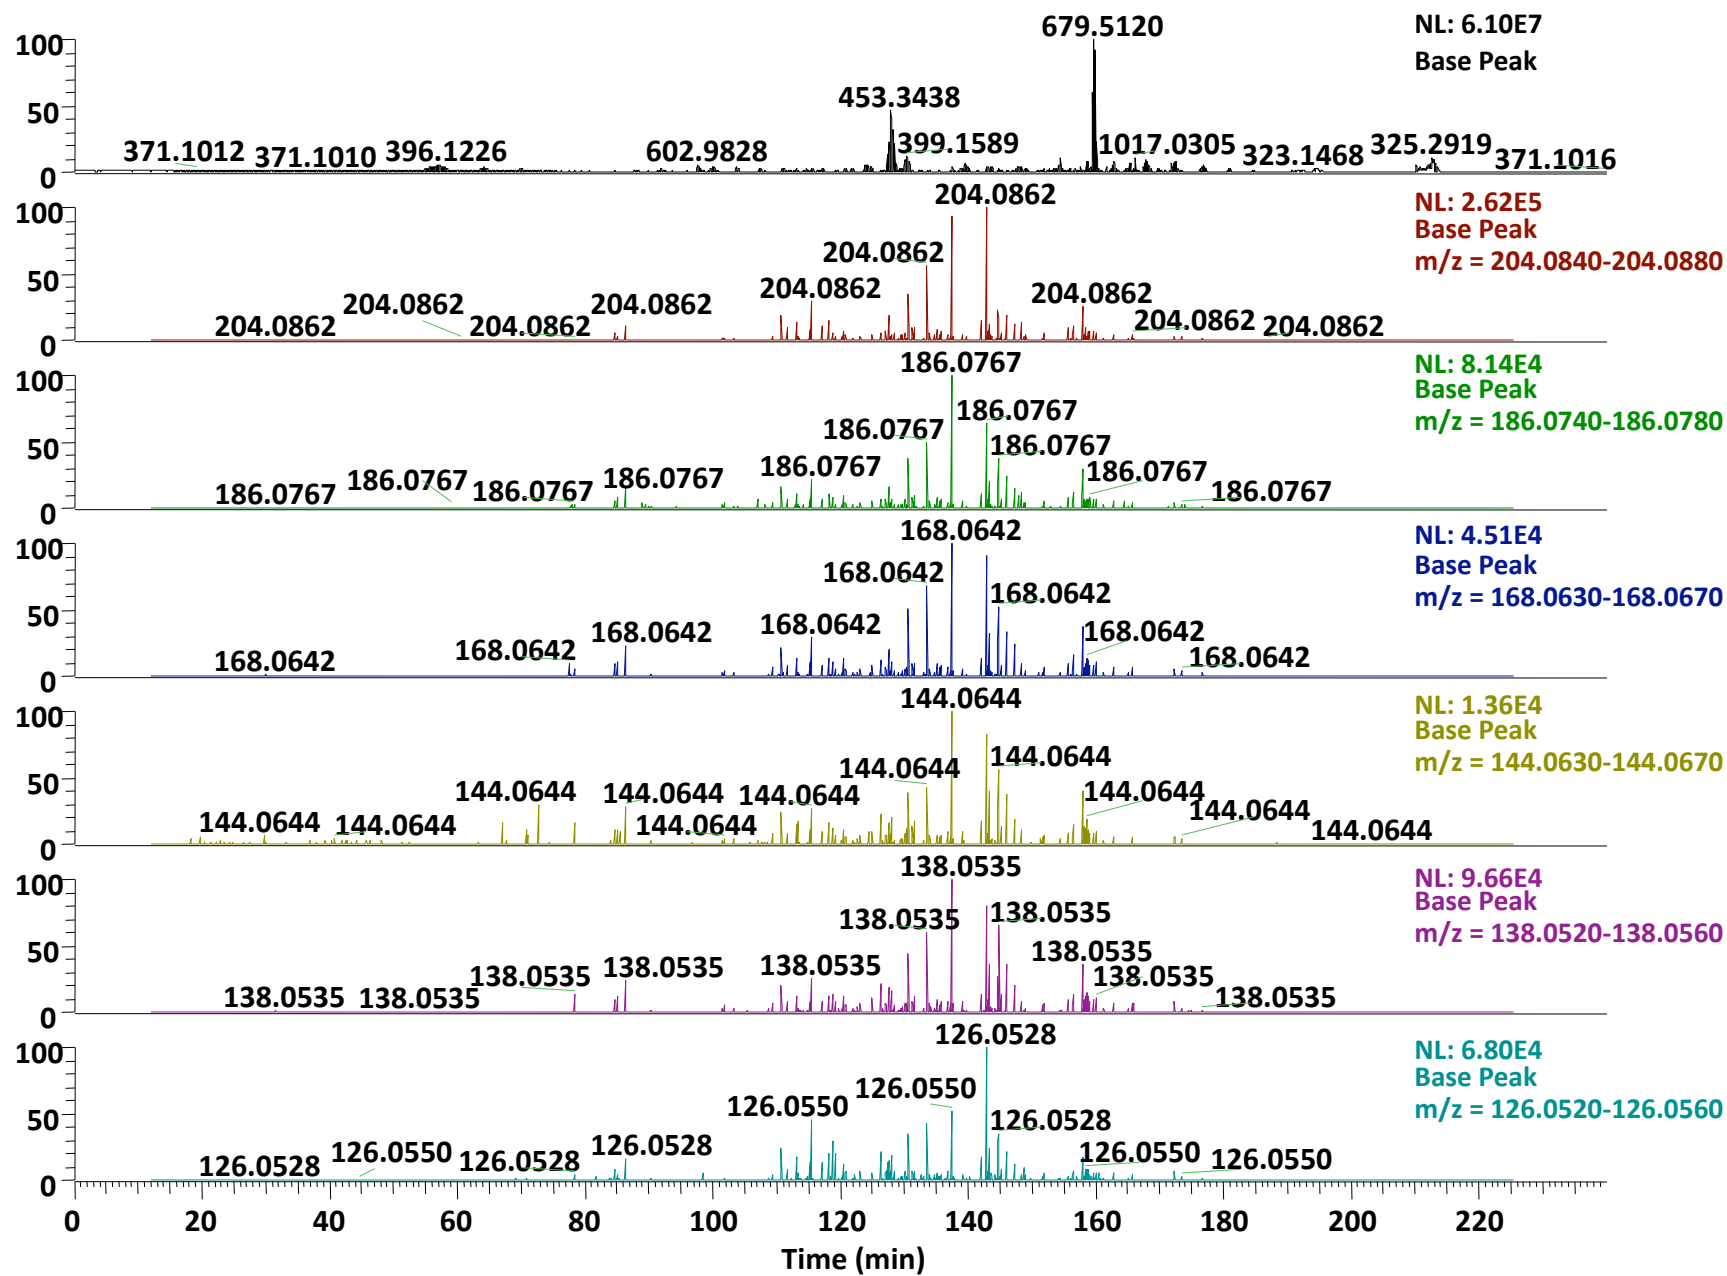

Fig. S3

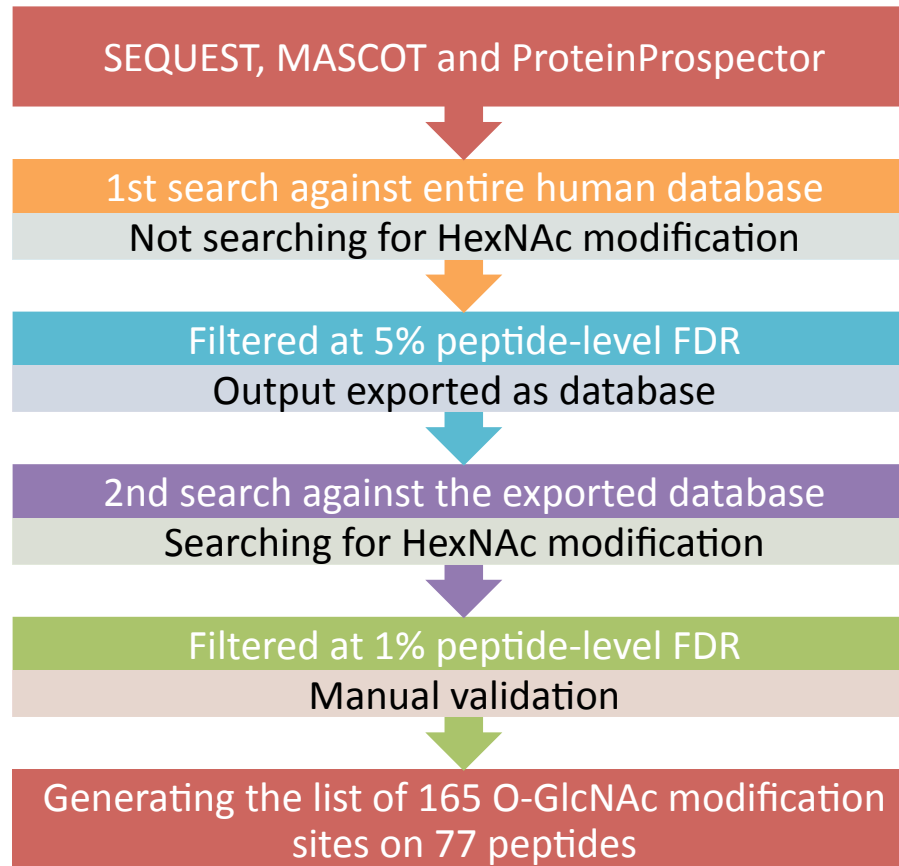

Fig. S4

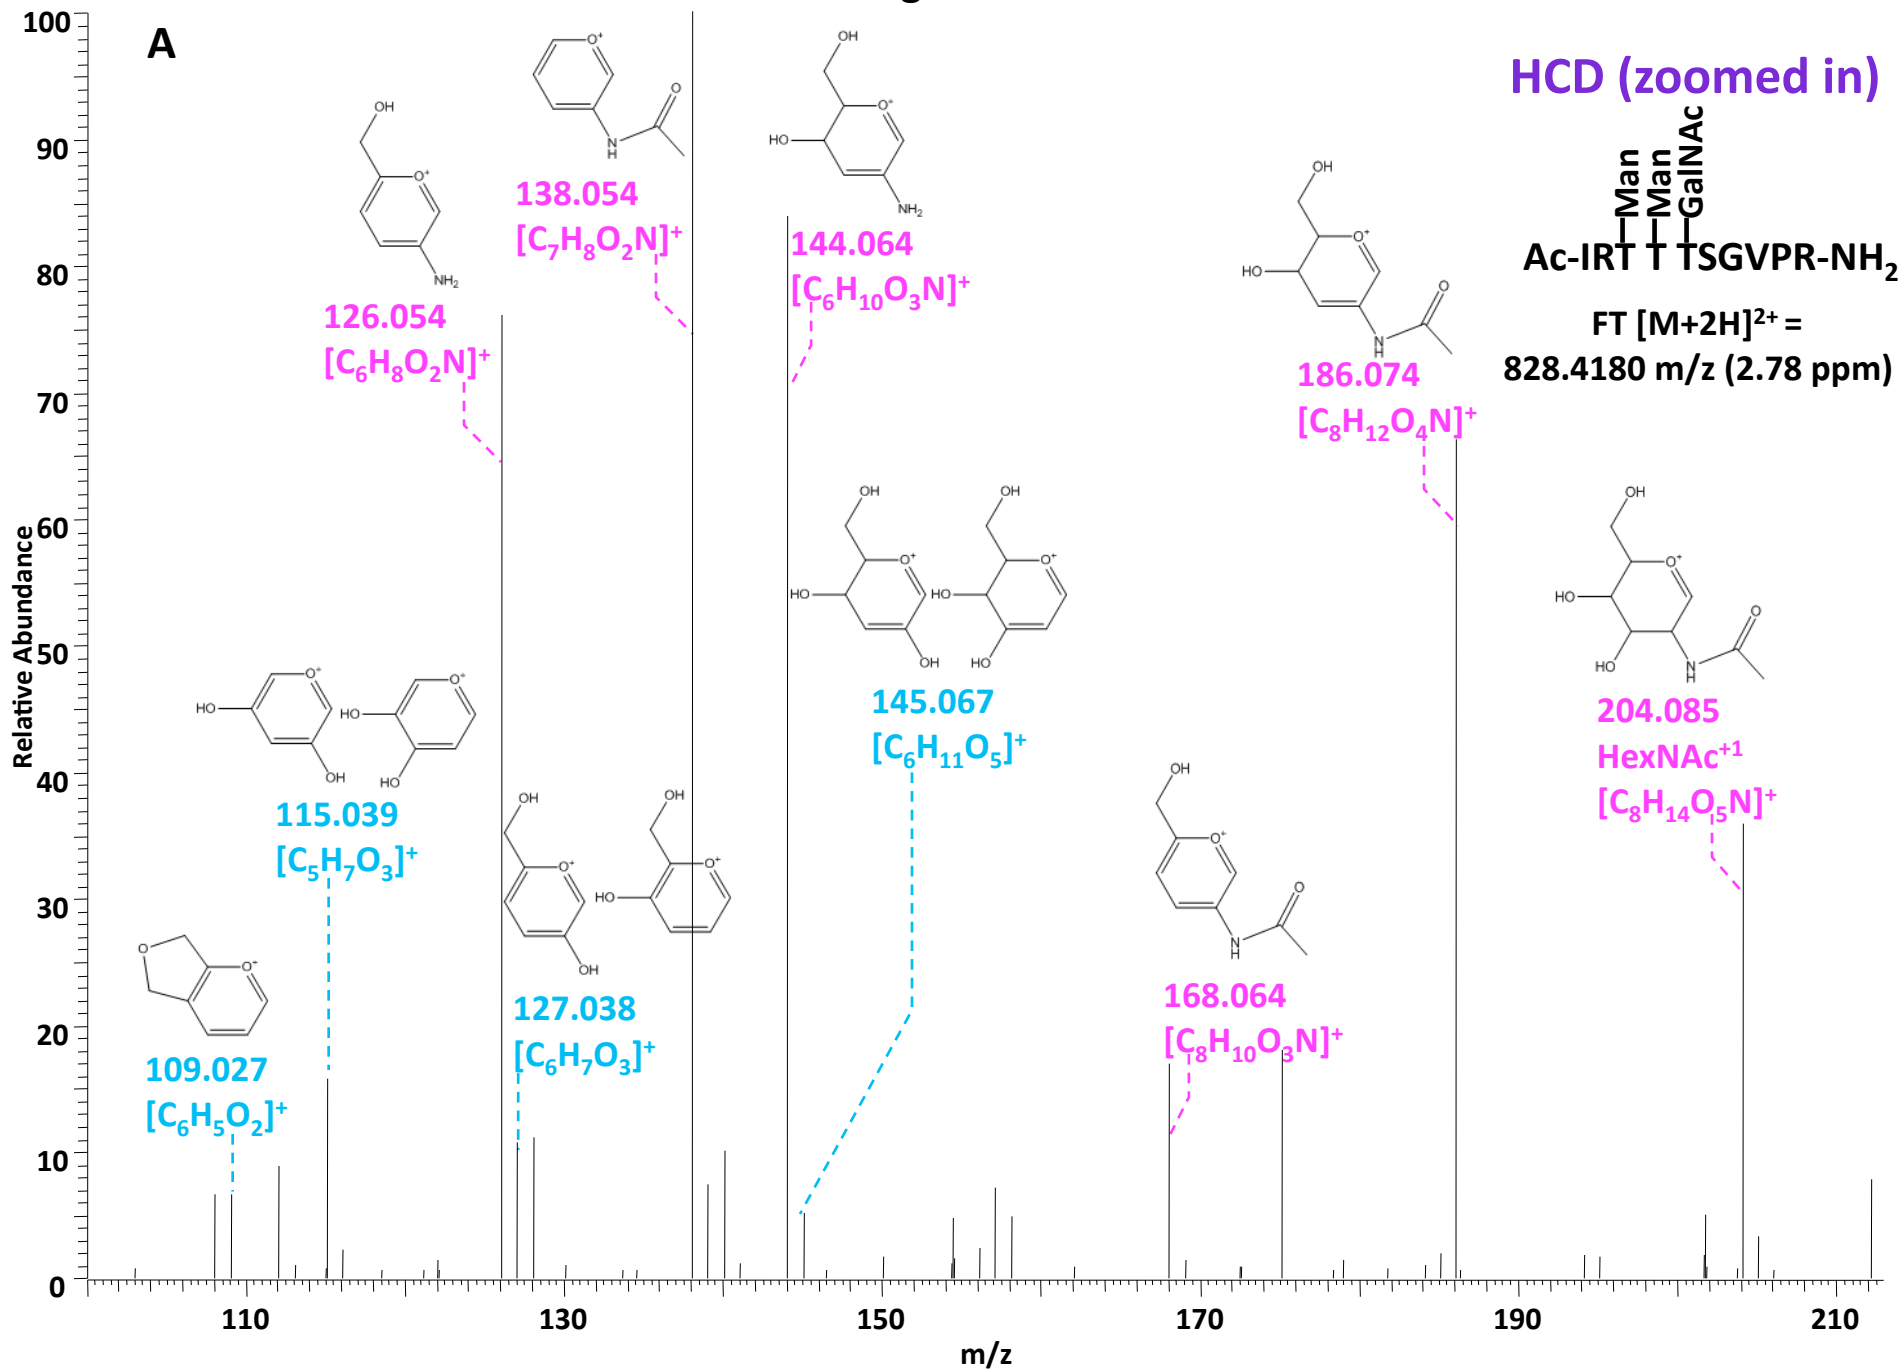

Fig. S4

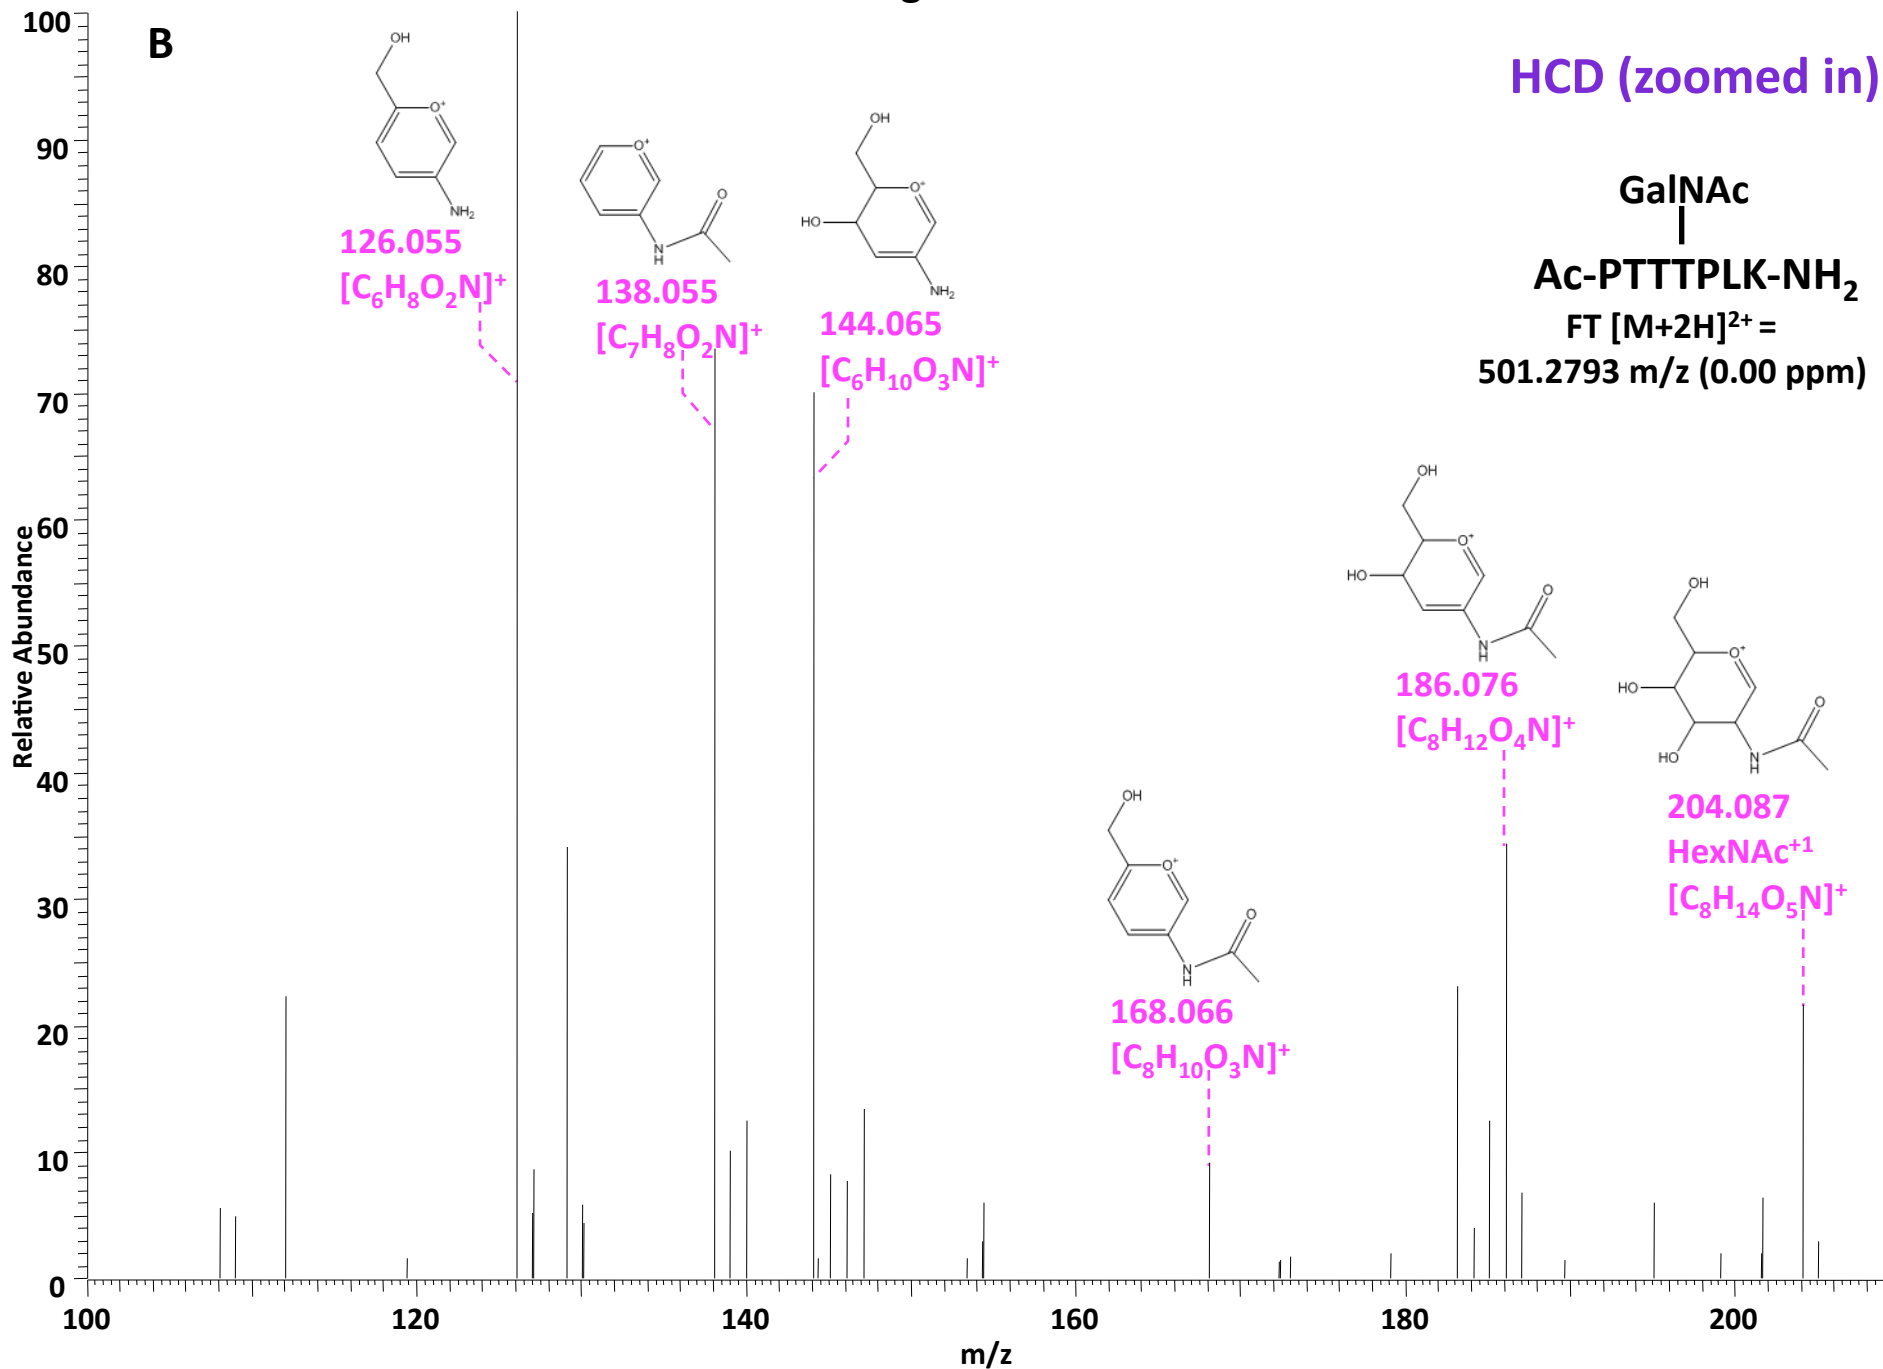



Fig. S4

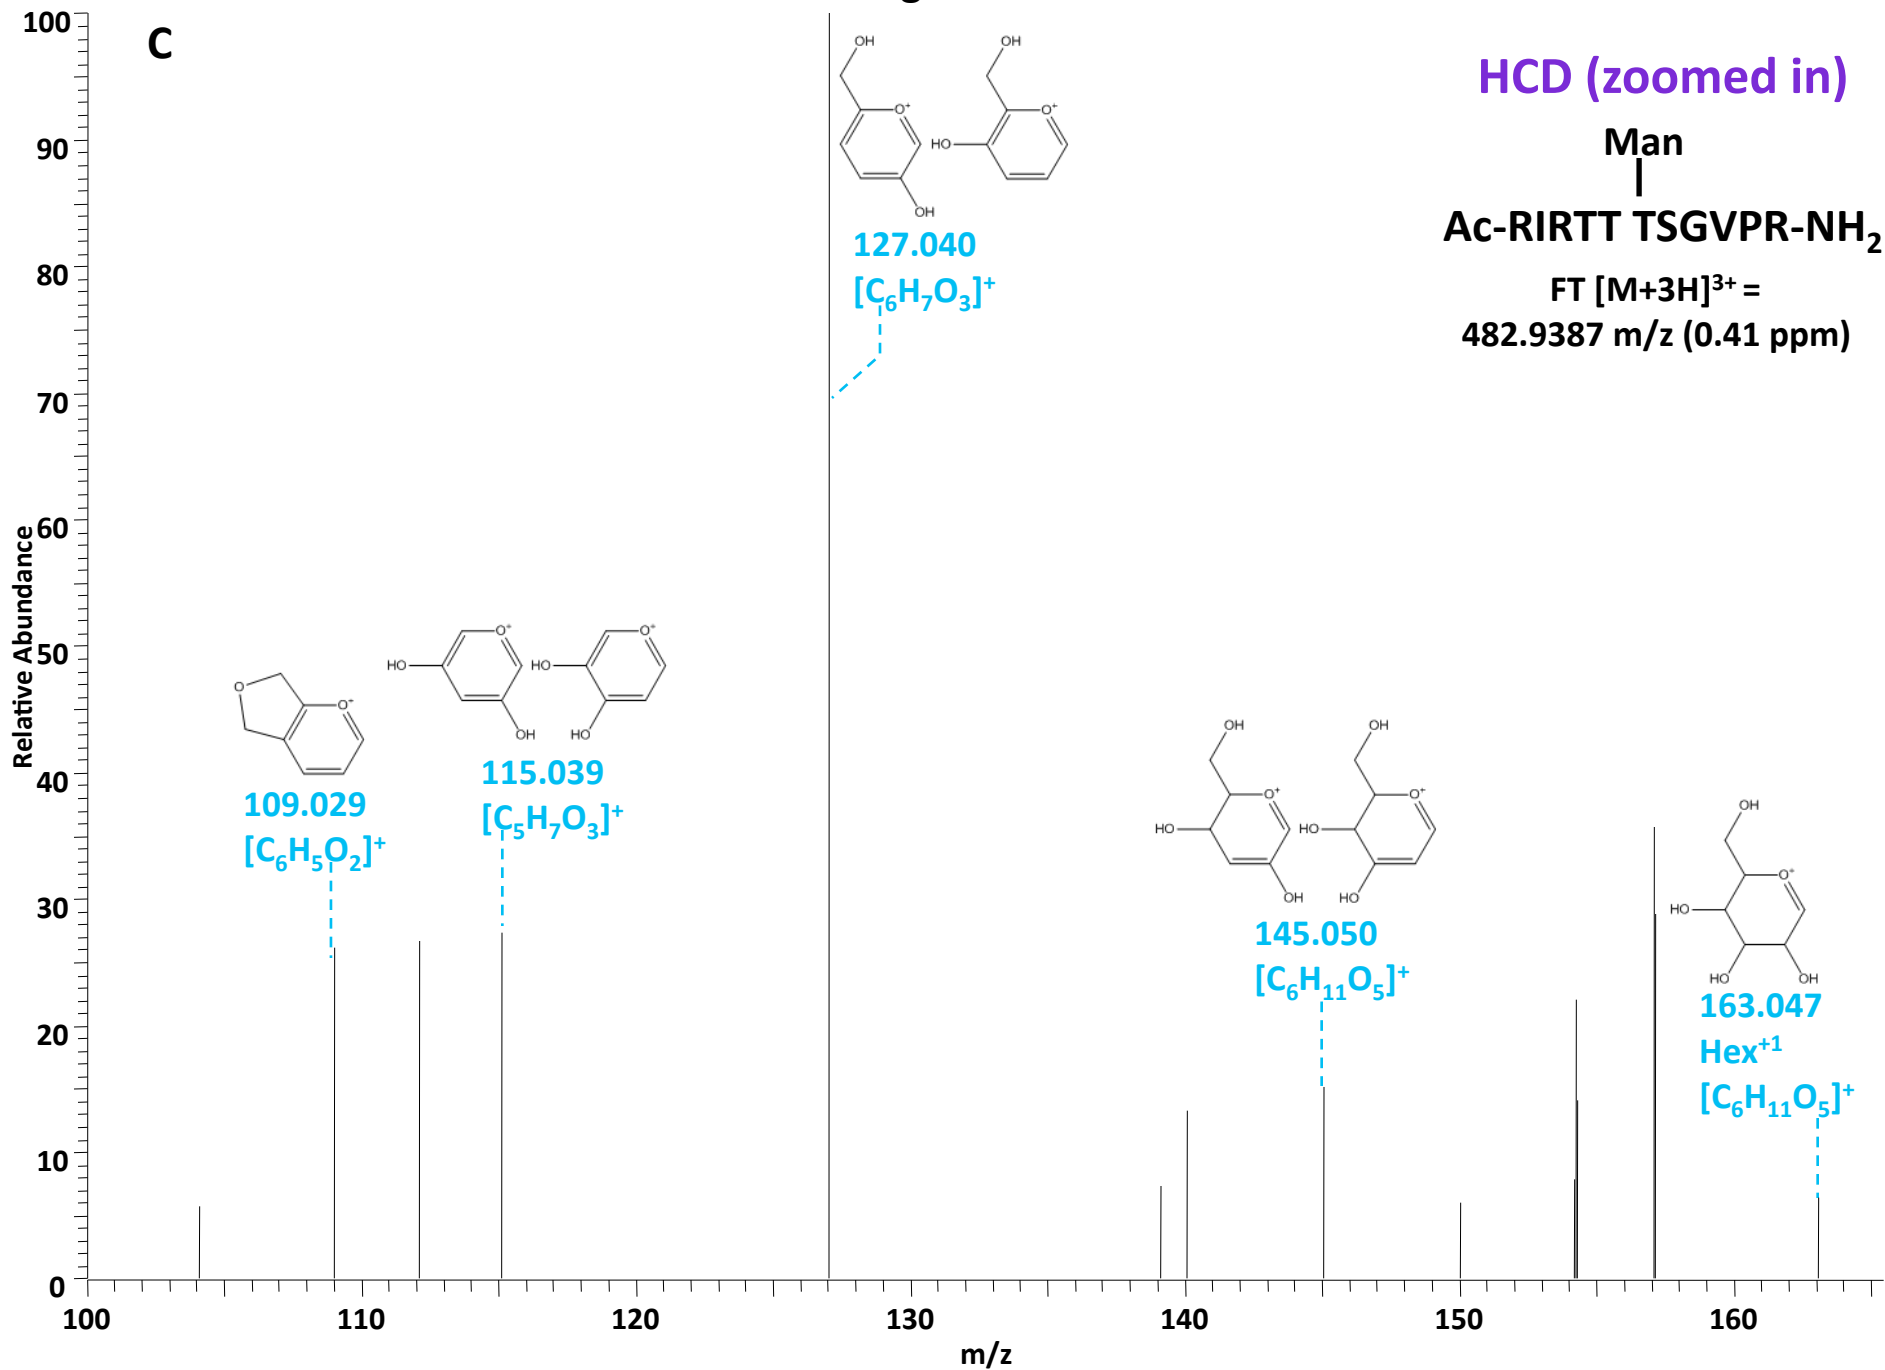

Fig. S4

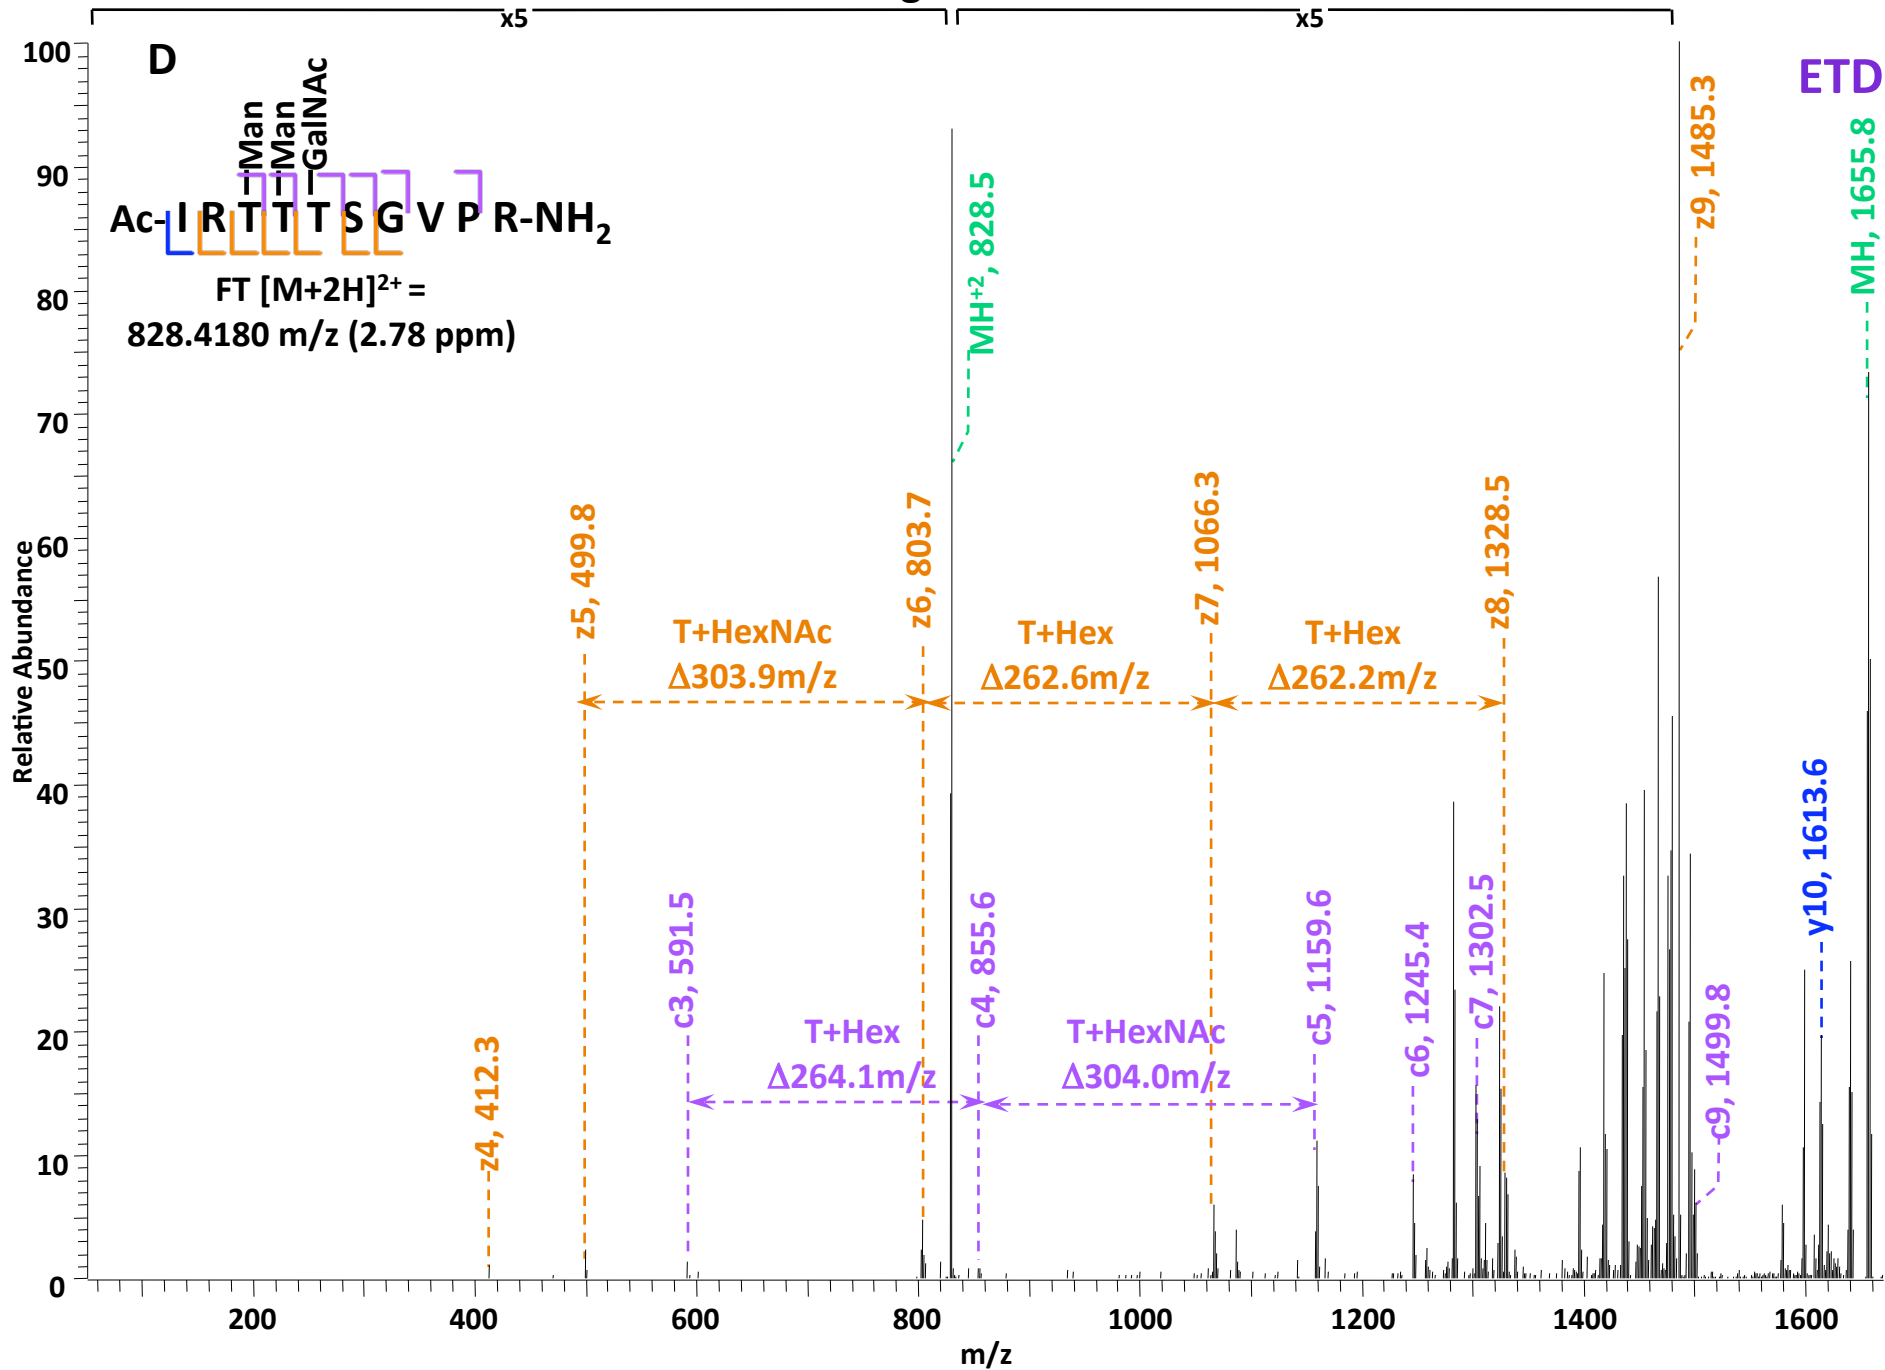

Fig. S4

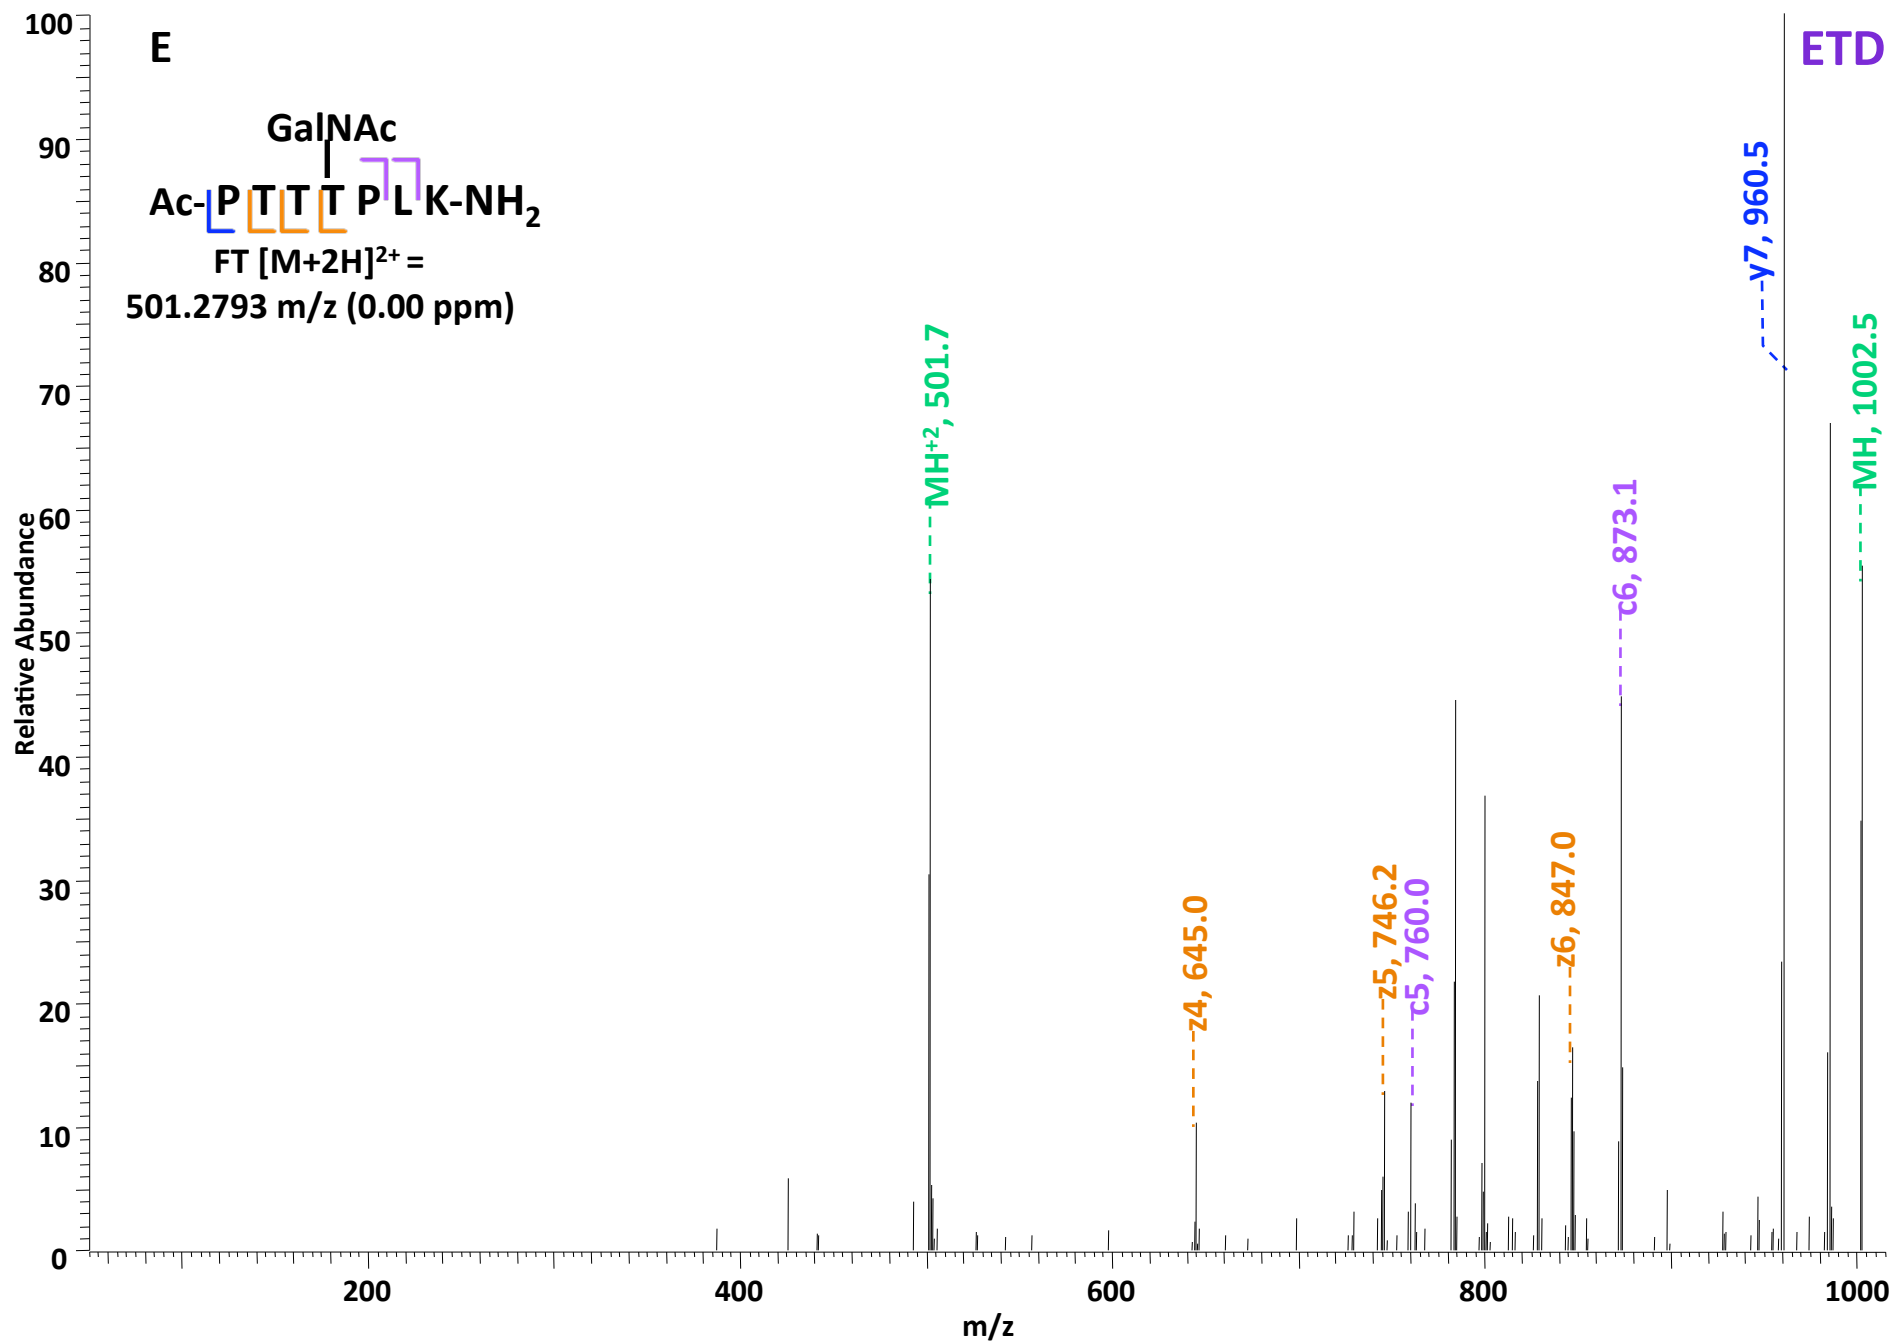

Fig. S4

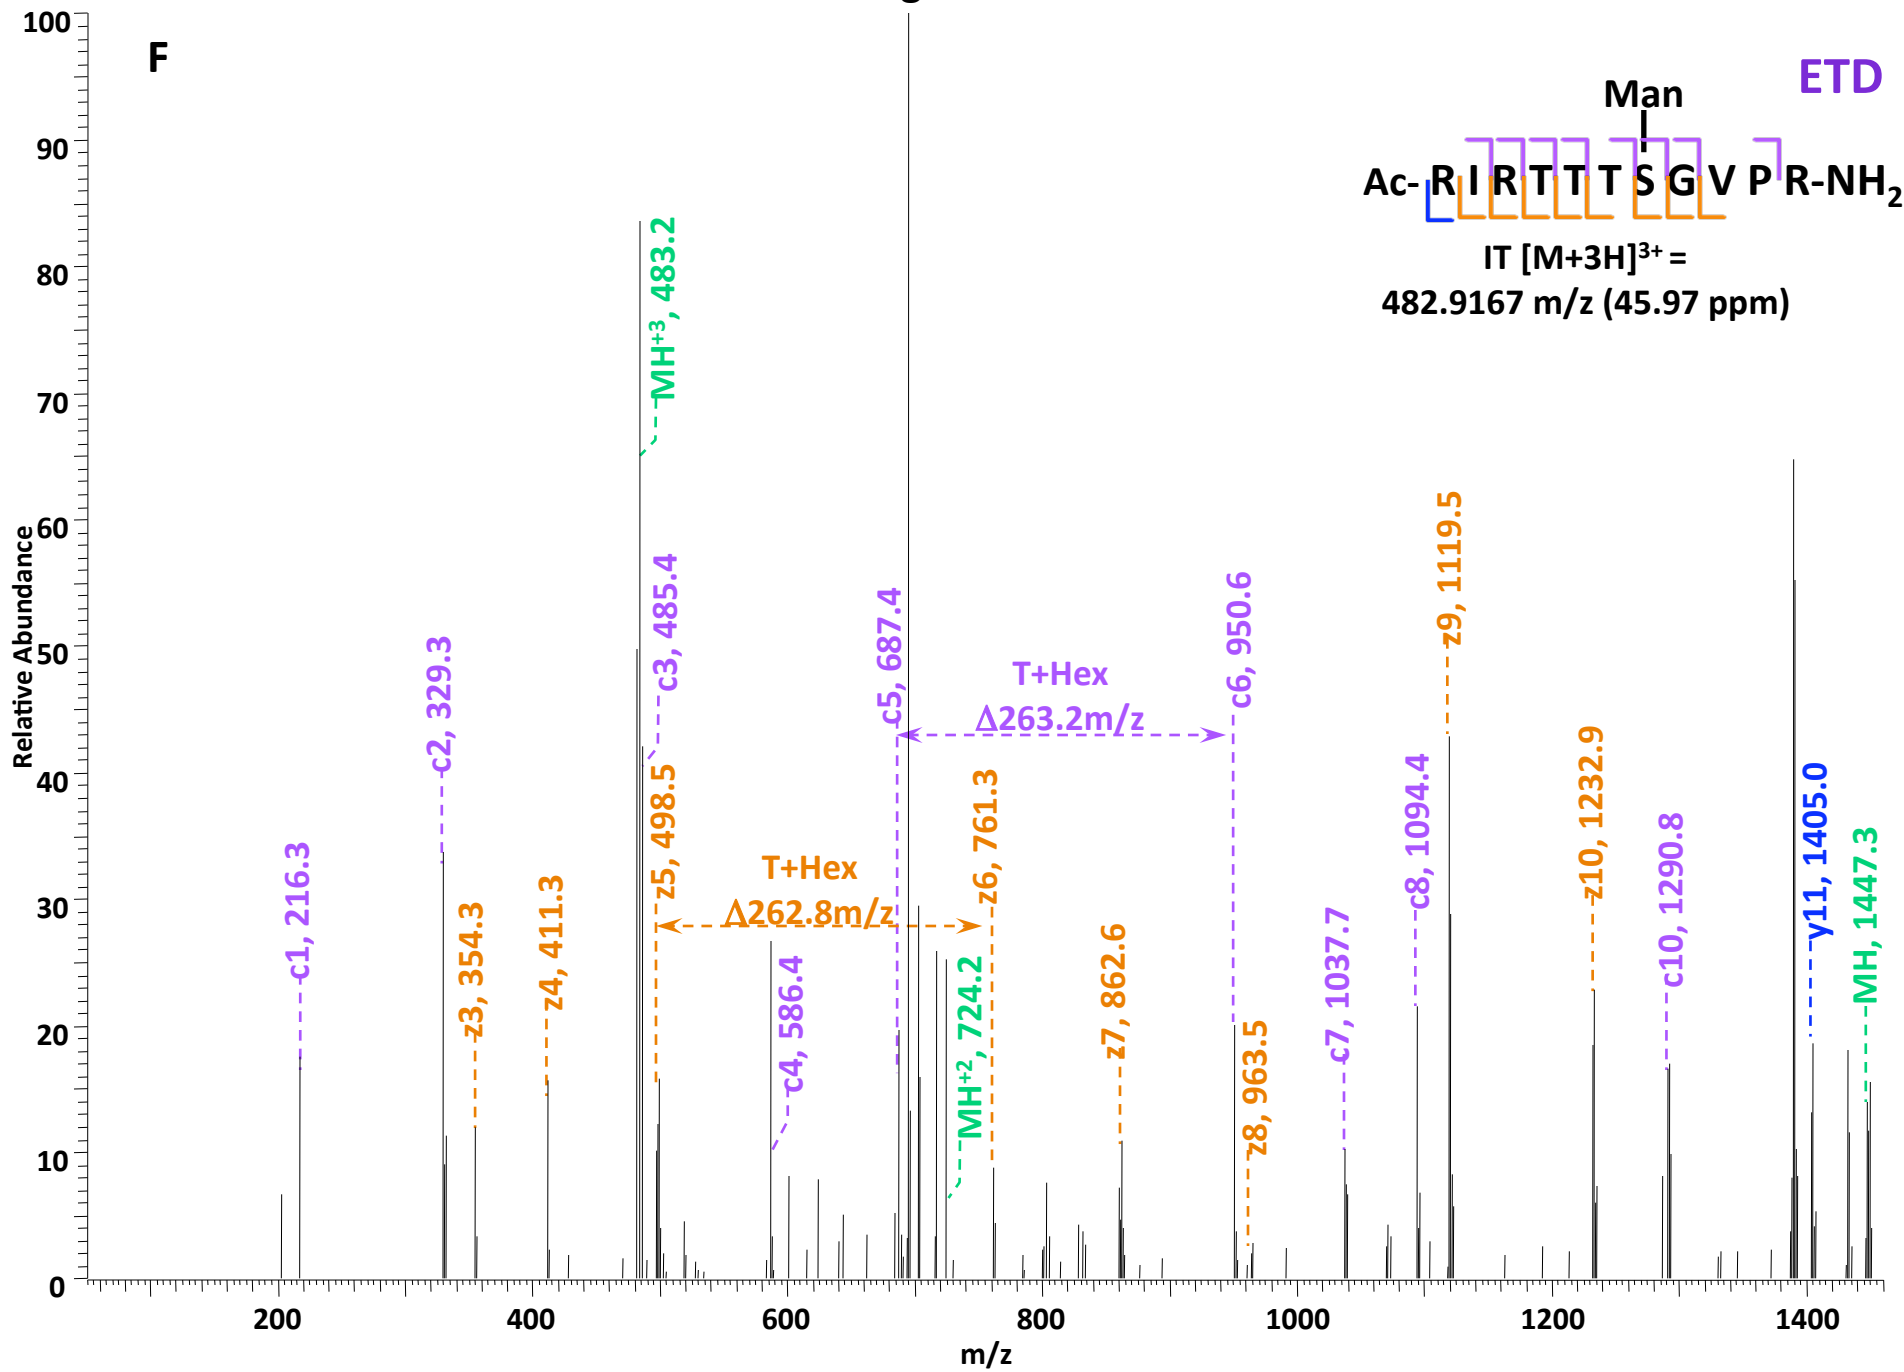

Supplement: NIHMS314262-supplement-1_si_001.pdf [file NIHMS314262-supplement-1_si_001.pdf]
